# Supplementary material
Source: PubMed Central journal article supplement (PMC8033617)
Supplement: pt0c00207_si_001.pdf [file pt0c00207_si_001.pdf]

## Supplemental Information

# Small Molecule Targeting of Oxysterol-Binding Protein (OSBP)-Related Protein 4 (ORP4) and OSBP Inhibits Ovarian Cancer Cell Proliferation in Monolayer and Spheroid Cell Models

Ryan C. Bensen<sup>a,†</sup>, Gokhan Gunay<sup>b,†</sup>, Matthew C. Finneran<sup>a</sup>, Isha Jhingan<sup>b</sup>, Handan Acar<sup>\* b,d</sup>, Anthony W. G. Burgett<sup>\*a,c,d</sup>

---

<sup>†</sup> co-first authors

[a] Department of Chemistry and Biochemistry, University of Oklahoma, Norman, OK 73019

[b] Stephenson School of Biomedical Engineering, University of Oklahoma, Norman, OK 73019, USA

[c] Department of Pharmaceutical Sciences, University of Oklahoma Health Sciences Center, Oklahoma City, OK 73117, USA

[d] Stephenson Cancer Center, University of Oklahoma, OK 73104, USA

### CORRESPONDING AUTHORS

E-mail: anthony-burgett@ouhsc.edu

E-mail: hacar@ou.edu

### TABLE OF CONTENTS.

|                                                                                         |     |
|-----------------------------------------------------------------------------------------|-----|
| Title/Table of Contents                                                                 | S-1 |
| Figure S-1: OVCAR-8 and SKOV-3 spheroid morphology.                                     | S-2 |
| Figure S-2: Effects of compound treatment on OVCAR-8 and SKOV-3 spheroids...            | S-3 |
| Figure S-3: Effects of OSW-1 on ovarian cancer cells morphology and viability.          | S-4 |
| Figure S-4: SKOV-3 spheroid development with 10% FBS.                                   | S-5 |
| Figure S-5: Cell imaging of ovarian cancer cells grown under lipid depleted conditions. | S-6 |
| Figure S-6. Uncropped OSBP and ORP4 Western blots shown in Figure 1D.                   | S-7 |
| Figure S-7. Uncropped OSBP and ORP4 Western blots shown in Figure 5.                    | S-8 |

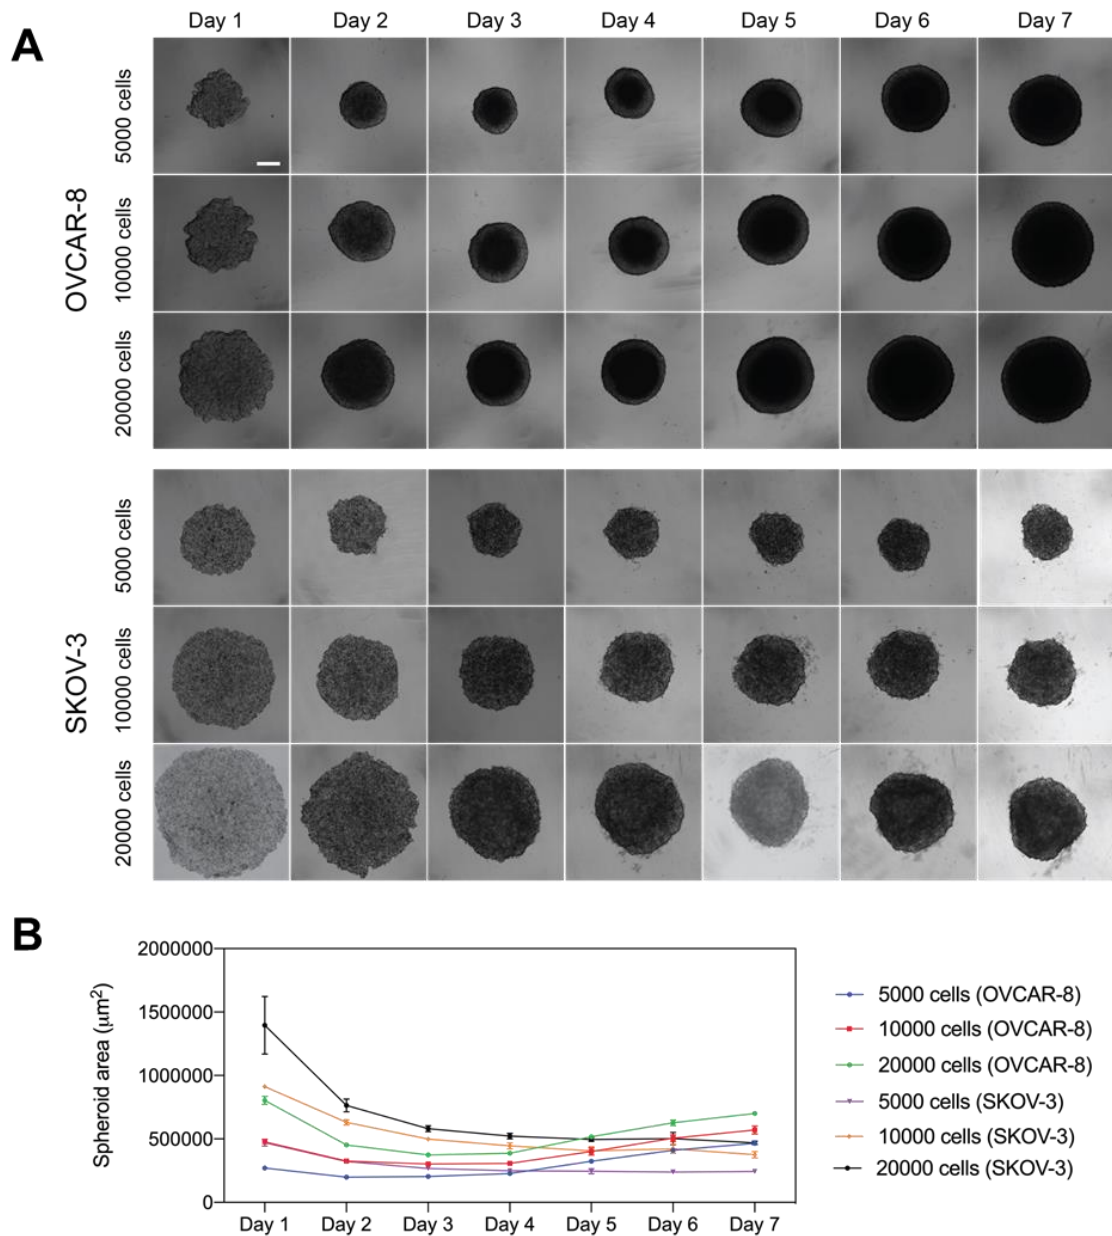

**Figure S-1: OVCAR-8 and SKOV-3 spheroid morphology.** A) OVCAR-8 and SKOV-3 spheroids seeded at the provided density for 7 days. B) Spheroid area measurement for either OVCAR-8 or SKOV-3 spheroids over the course of 7 days.

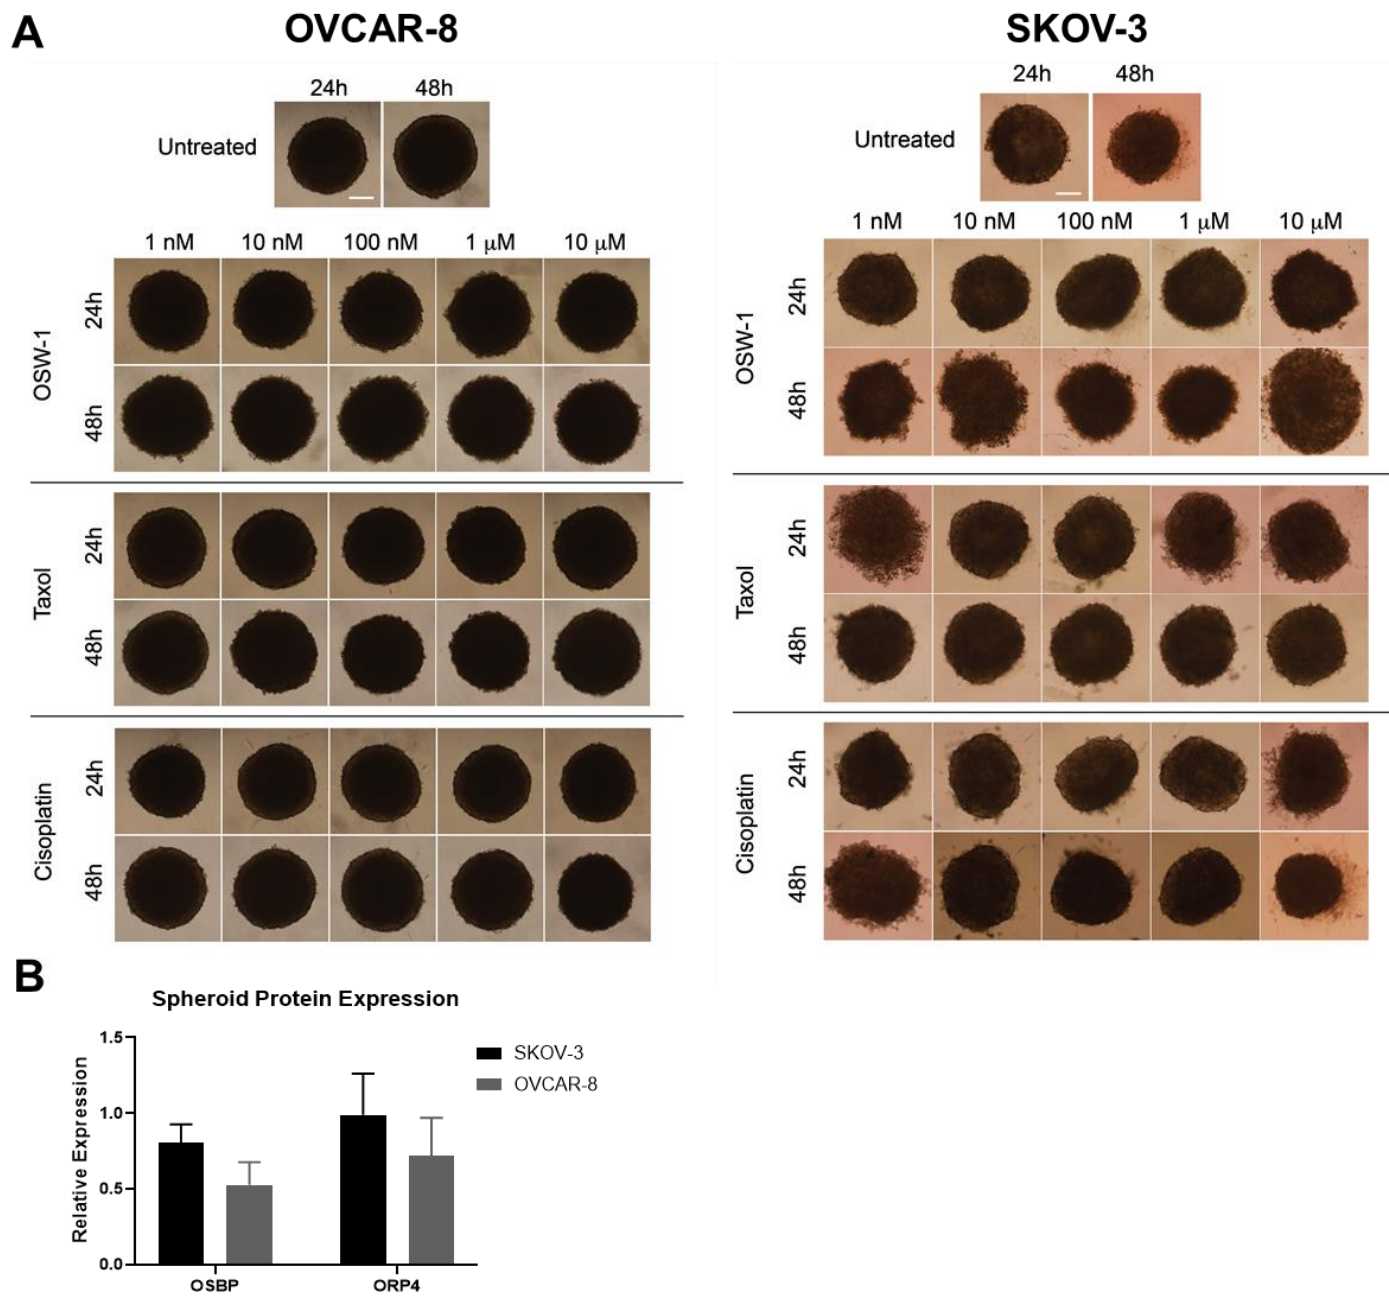

**Figure S-2: Effects of compound treatment on OVCAR-8 and SKOV-3 spheroids.** A) Images of 7-day-old SKOV-3 and OVCAR-8 spheroids treated with the indicated concentrations of compound at 24 and 48 h. B) Protein expression of OSBP and ORP4 in 7-day-old untreated spheroids relative to monolayer expression.

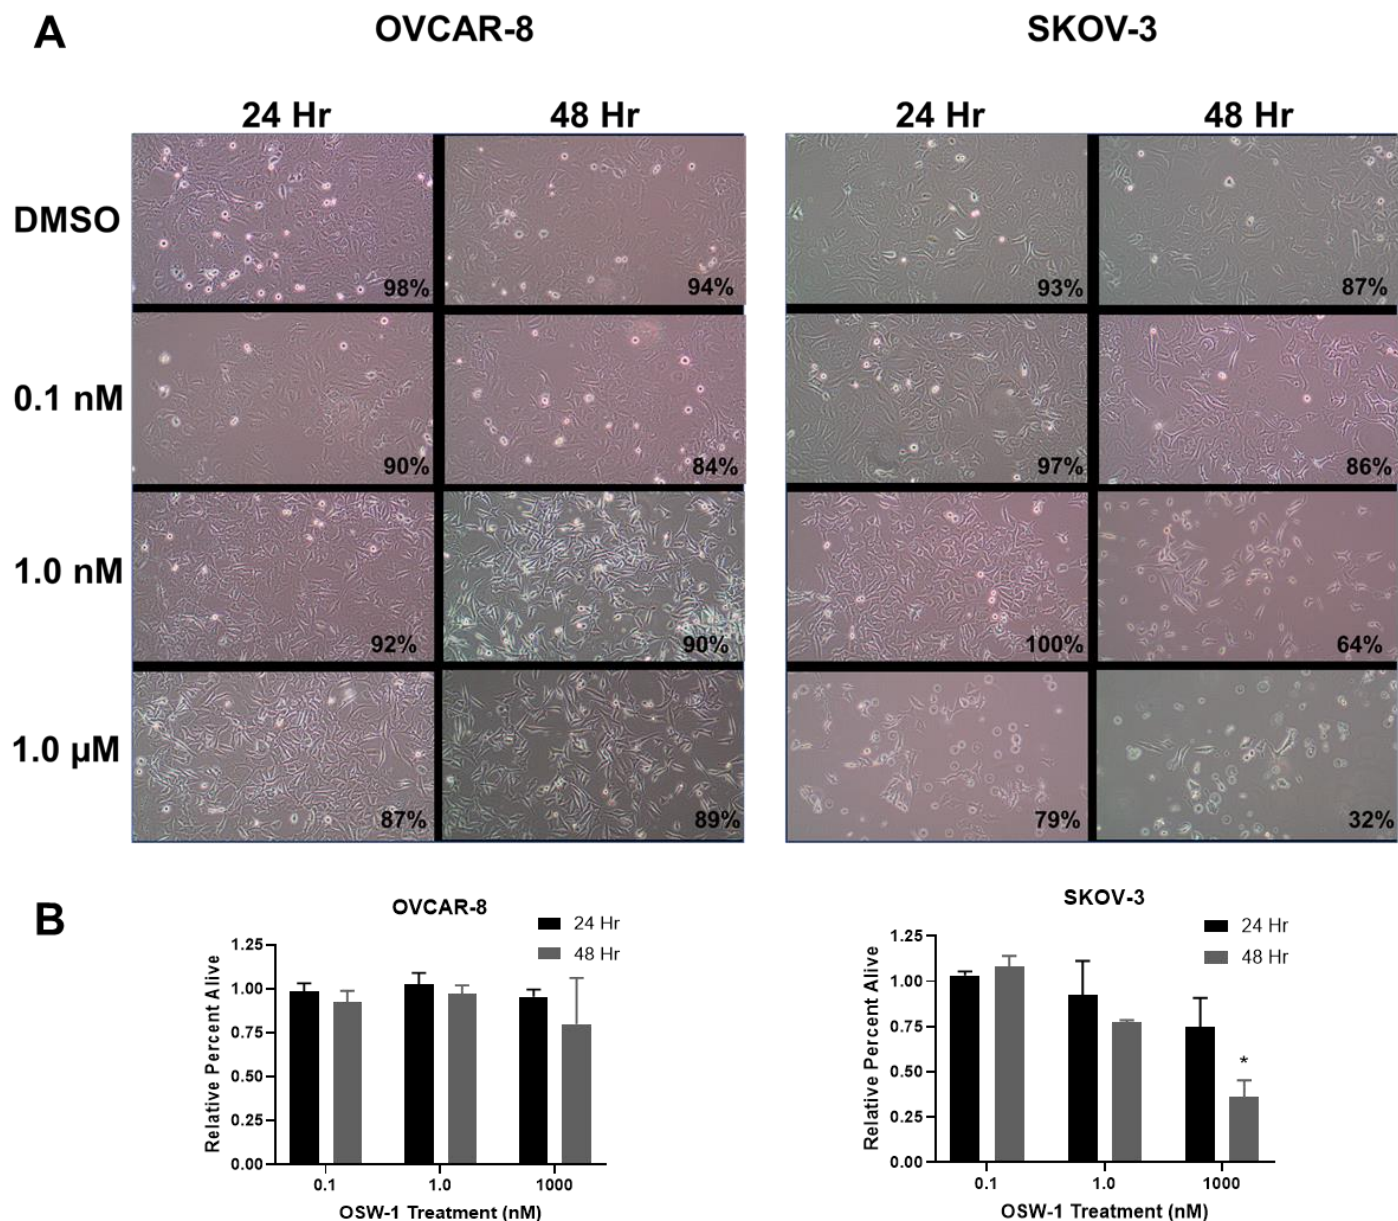

**Figure S-3: Effects of OSW-1 on ovarian cancer cells morphology and viability.** A) 40X light microscopy imaging of OVCAR-8 and SKOV-3 monolayer (2D) treated with either DMSO vehicle control or OSW-1 at the indicated concentrations, at 24 h and 48 h. B) Determination of viability of OVCAR-8 or SKOV-3 cells treated with in the indicated concentrations of OSW-1 at 24 h and 48 h, using Trypan Blue staining. \* = p value  $\leq 0.05$ .

## SKOV-3

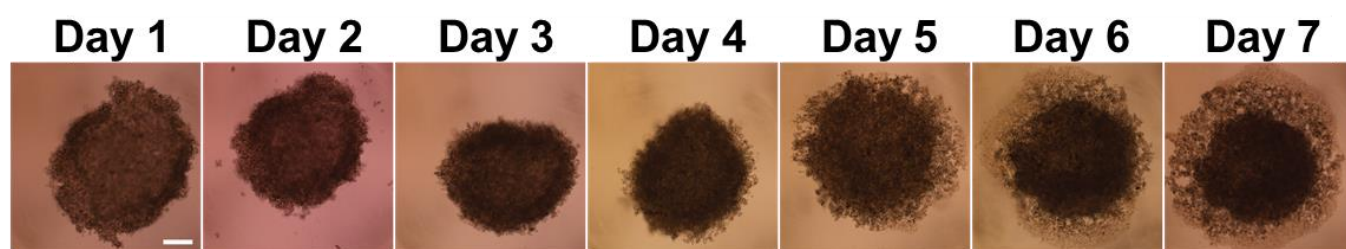

**Figure S-4: SKOV-3 spheroid development with 10% FBS.** 20,000 SKOV-3 cells culture as spheroids in the ultra-low attachment conditions failed to produce organized spheroids in the presence of FBS.

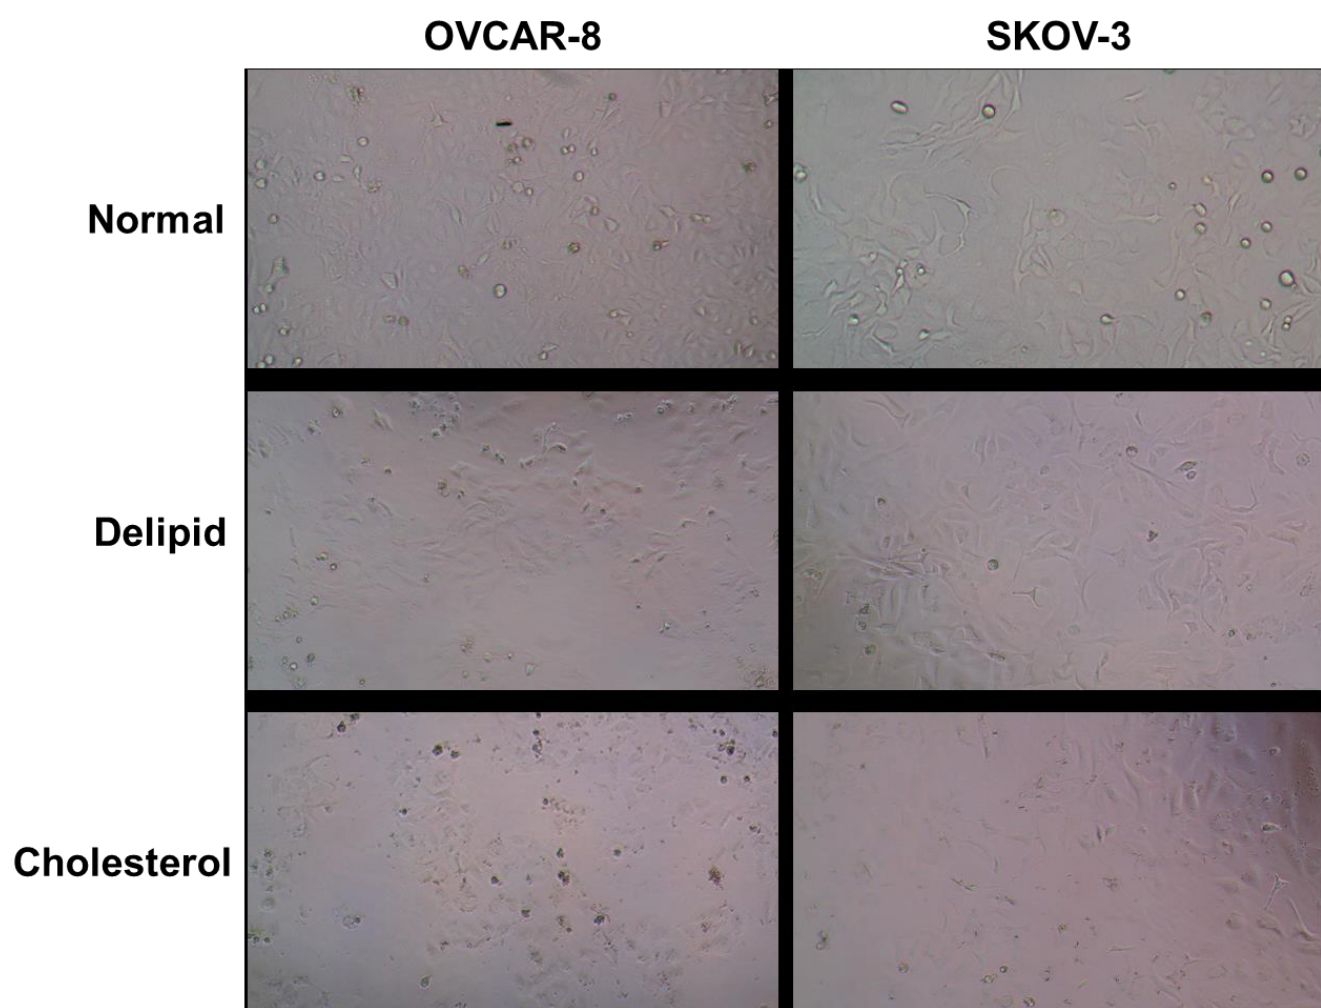

**Figure S-5: Cell imaging of ovarian cancer cells grown under lipid depleted conditions:** 40X magnification of OVCAR-8 and SKOV-3 2D cells grown in normal media (RPMI with 10% FBS), delipidated media (RPMI with 10% delipidated FBS), or cholesterol-supplemented delipidated media (RPMI with 10% delipidated FBS and 20 µg/mL cholesterol) for 96 h.

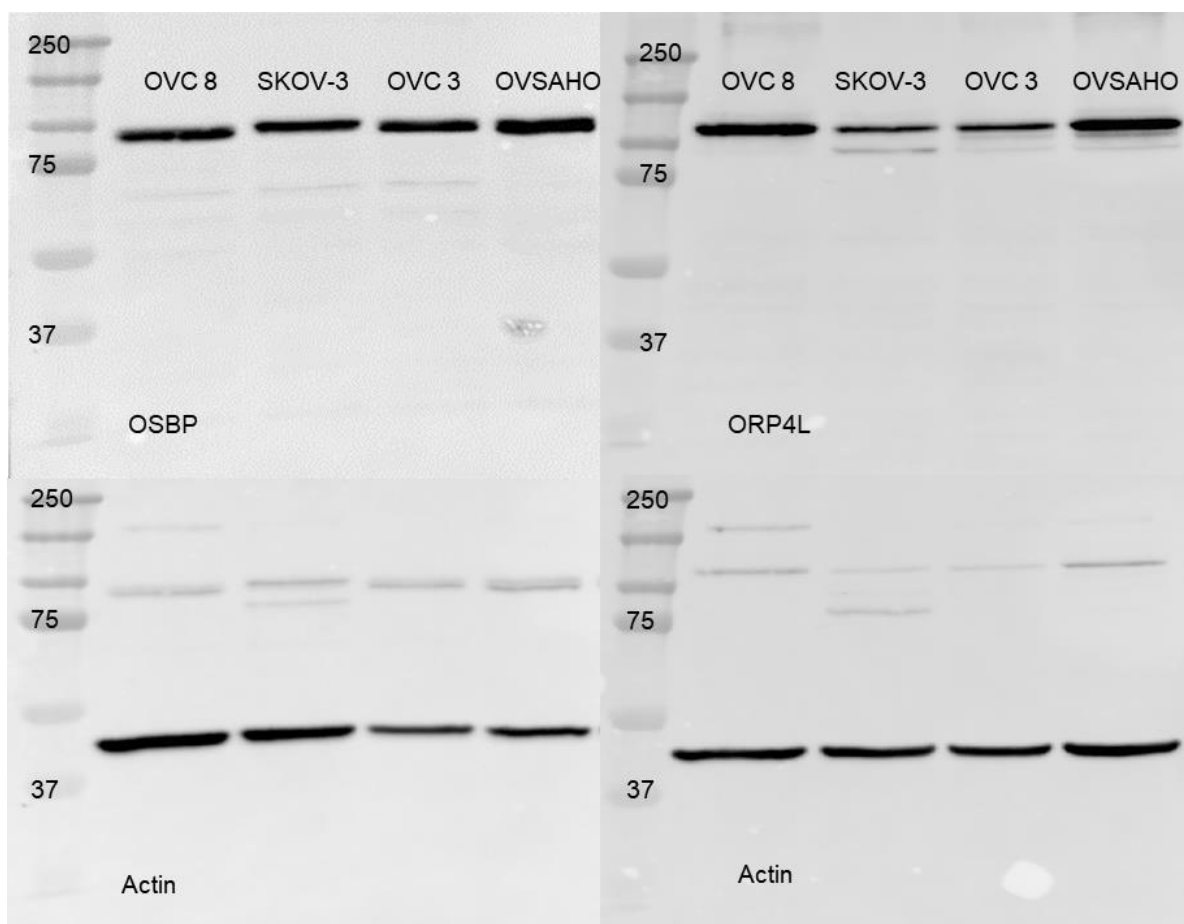

**Figure S-6. Uncropped OSBP and ORP4 Western blots shown in Figure 1D.**

### SKOV-3 Monolayer

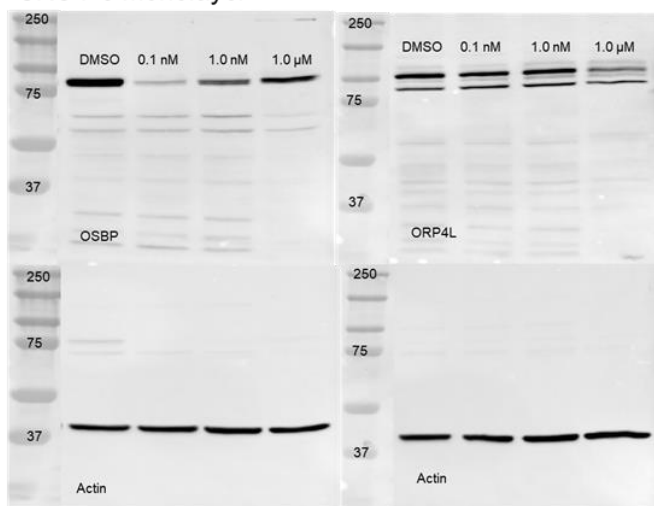

### SKOV-3 Spheroid

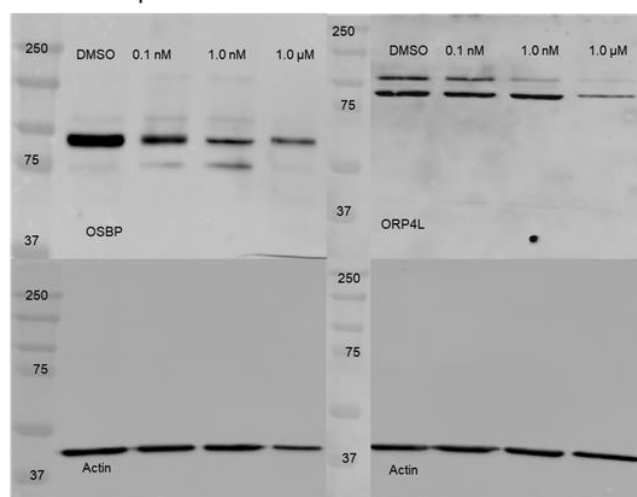

### OVCAR-8 Monolayer

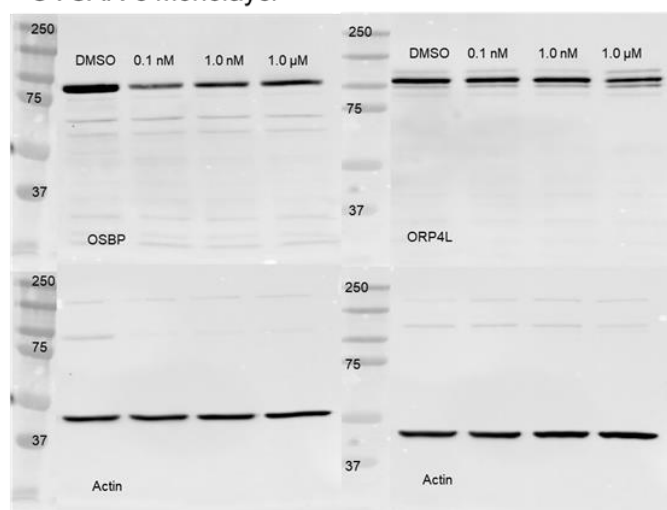

### OVCAR-8 Spheroid

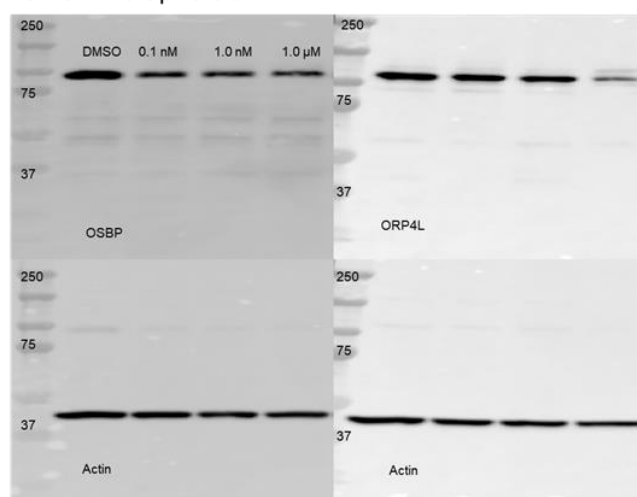

**Figure S-7. Uncropped OSBP and ORP4 Western blots shown in Figure 5.**
